# Supplementary material
Source: PubMed Central journal article supplement (PMC4104819)
Supplement: NIHMS593497-supplement-Figure_s1.pdf [file NIHMS593497-supplement-Figure_s1.pdf]

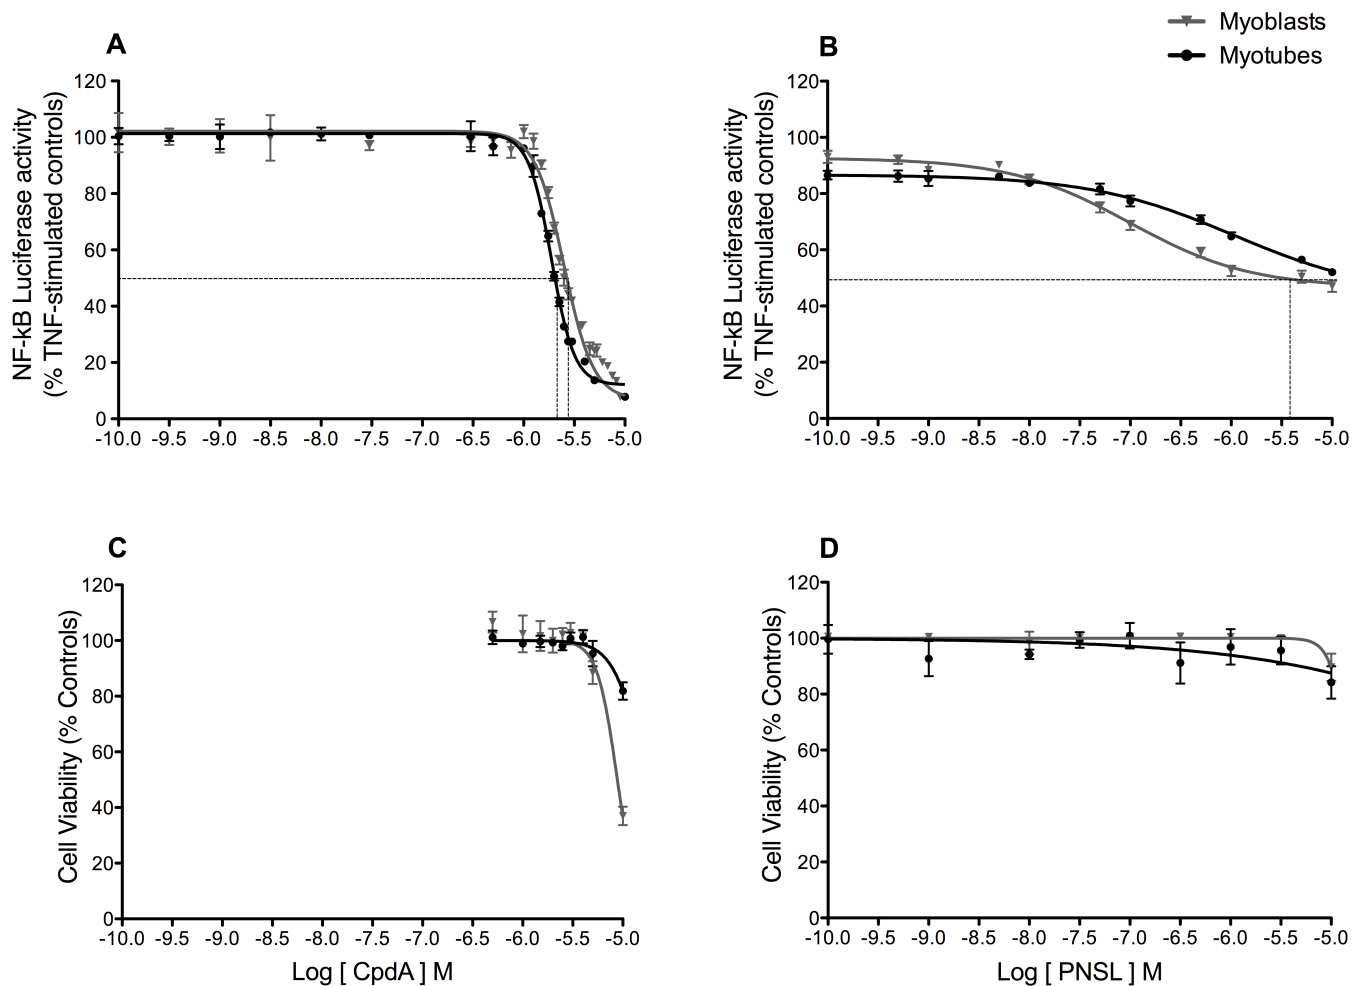

**Figure S1.** (A & C) Dose response and (B & D) cell viability (measured via an MTT assay) curves in myoblasts and myotubes for CpdA and PNSL at 11 incremental  $\frac{1}{2}$  log concentrations. Curves were generated by performing a minimum of three independent experiments, in triplicates, for each concentration as described in the Methods. CpdA is a potent inhibitor of NF- $\kappa$ B Luciferase activity in C2C12 myoblasts and myotubes with a range of effective concentrations of 1 to 4  $\mu$ M. Triplicates for each experiment were averaged. The  $IC_{50}$  in myoblasts and myotubes was 2.5  $\mu$ M and 1.9  $\mu$ M respectively. Measurements are expressed as mean  $\pm$  SEM.
