# Supplementary material
Source: PubMed Central journal article supplement (PMC4104819)
Supplement: NIHMS593497-supplement-Figure_s2.pdf [file NIHMS593497-supplement-Figure_s2.pdf]

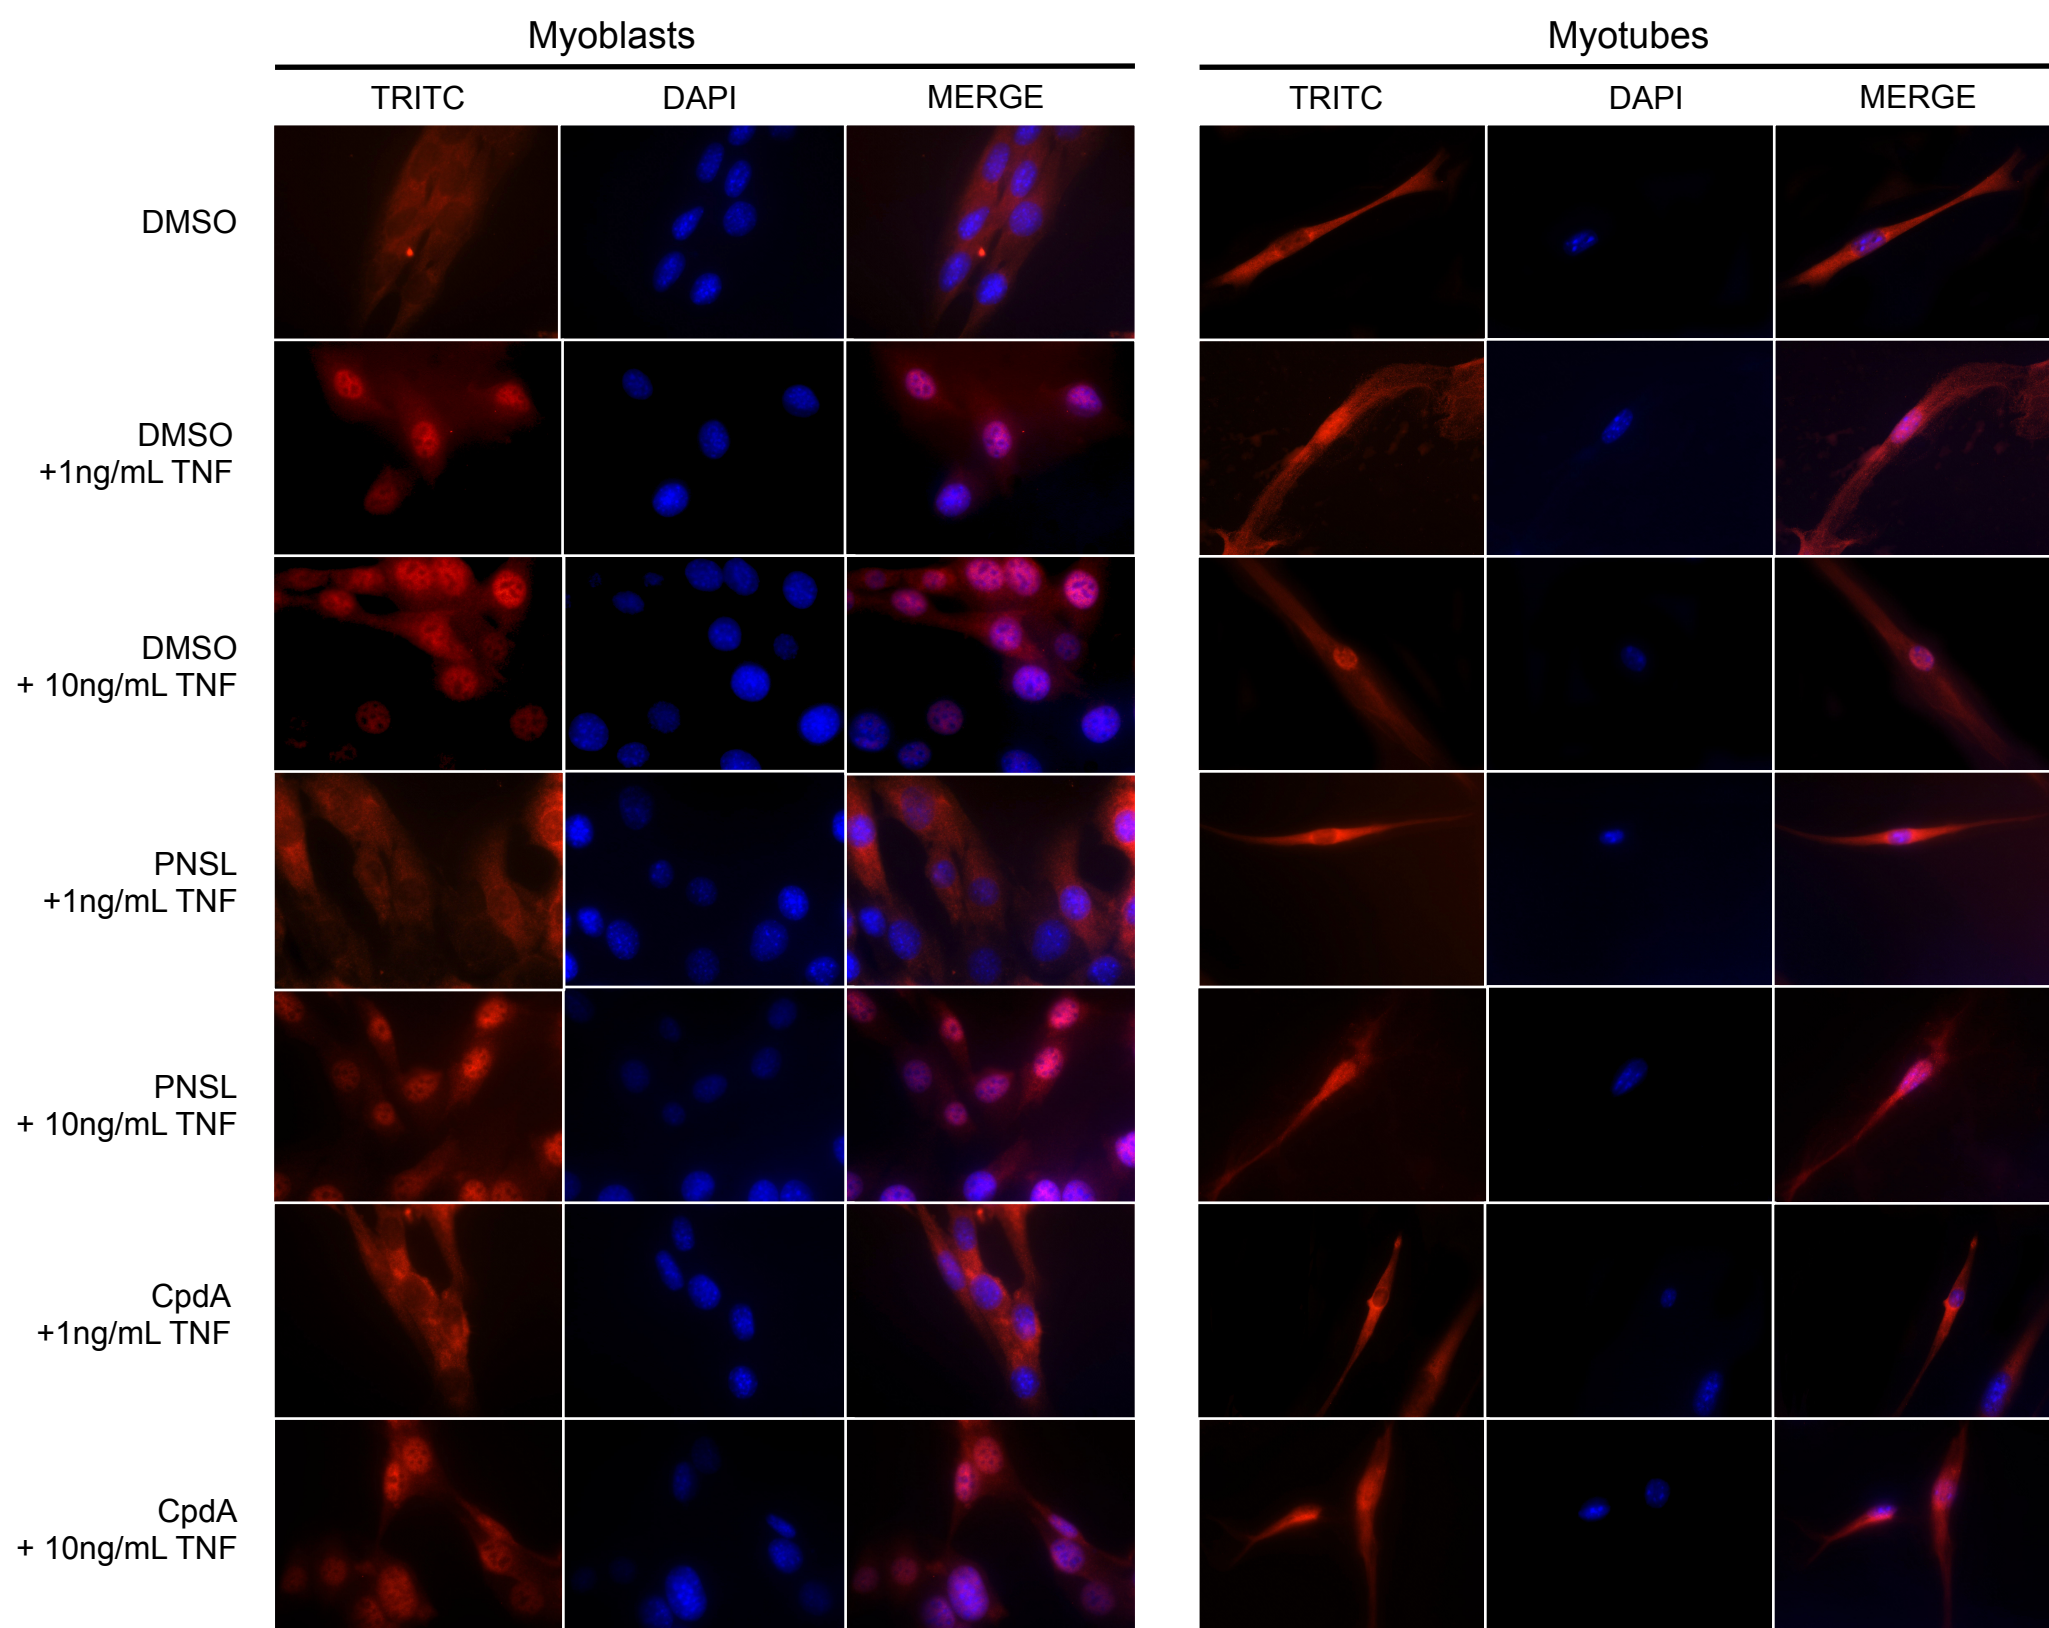

**Figure S2.** Qualitative analysis using immunofluorescence of p65 nuclear translocation in H-2K *mdx* myoblasts and myotubes. CpdA reduces TNF-induced p65 nuclear translocation in H-2K *mdx* myoblasts and myotubes. H-2K muscle cells were pre-treated with 1% DMSO, PNSL 10  $\mu$ M, or CpdA 4  $\mu$ M before stimulation with 1 or 10ng/mL TNF as described in the Methods. The study included a DMSO-treated, non-stimulated control. A minimum of three independent experiments were performed.
