# Supplementary material
Source: PubMed Central journal article supplement (PMC4104819)
Supplement: NIHMS593497-supplement-Figure_s3.pdf [file NIHMS593497-supplement-Figure_s3.pdf]

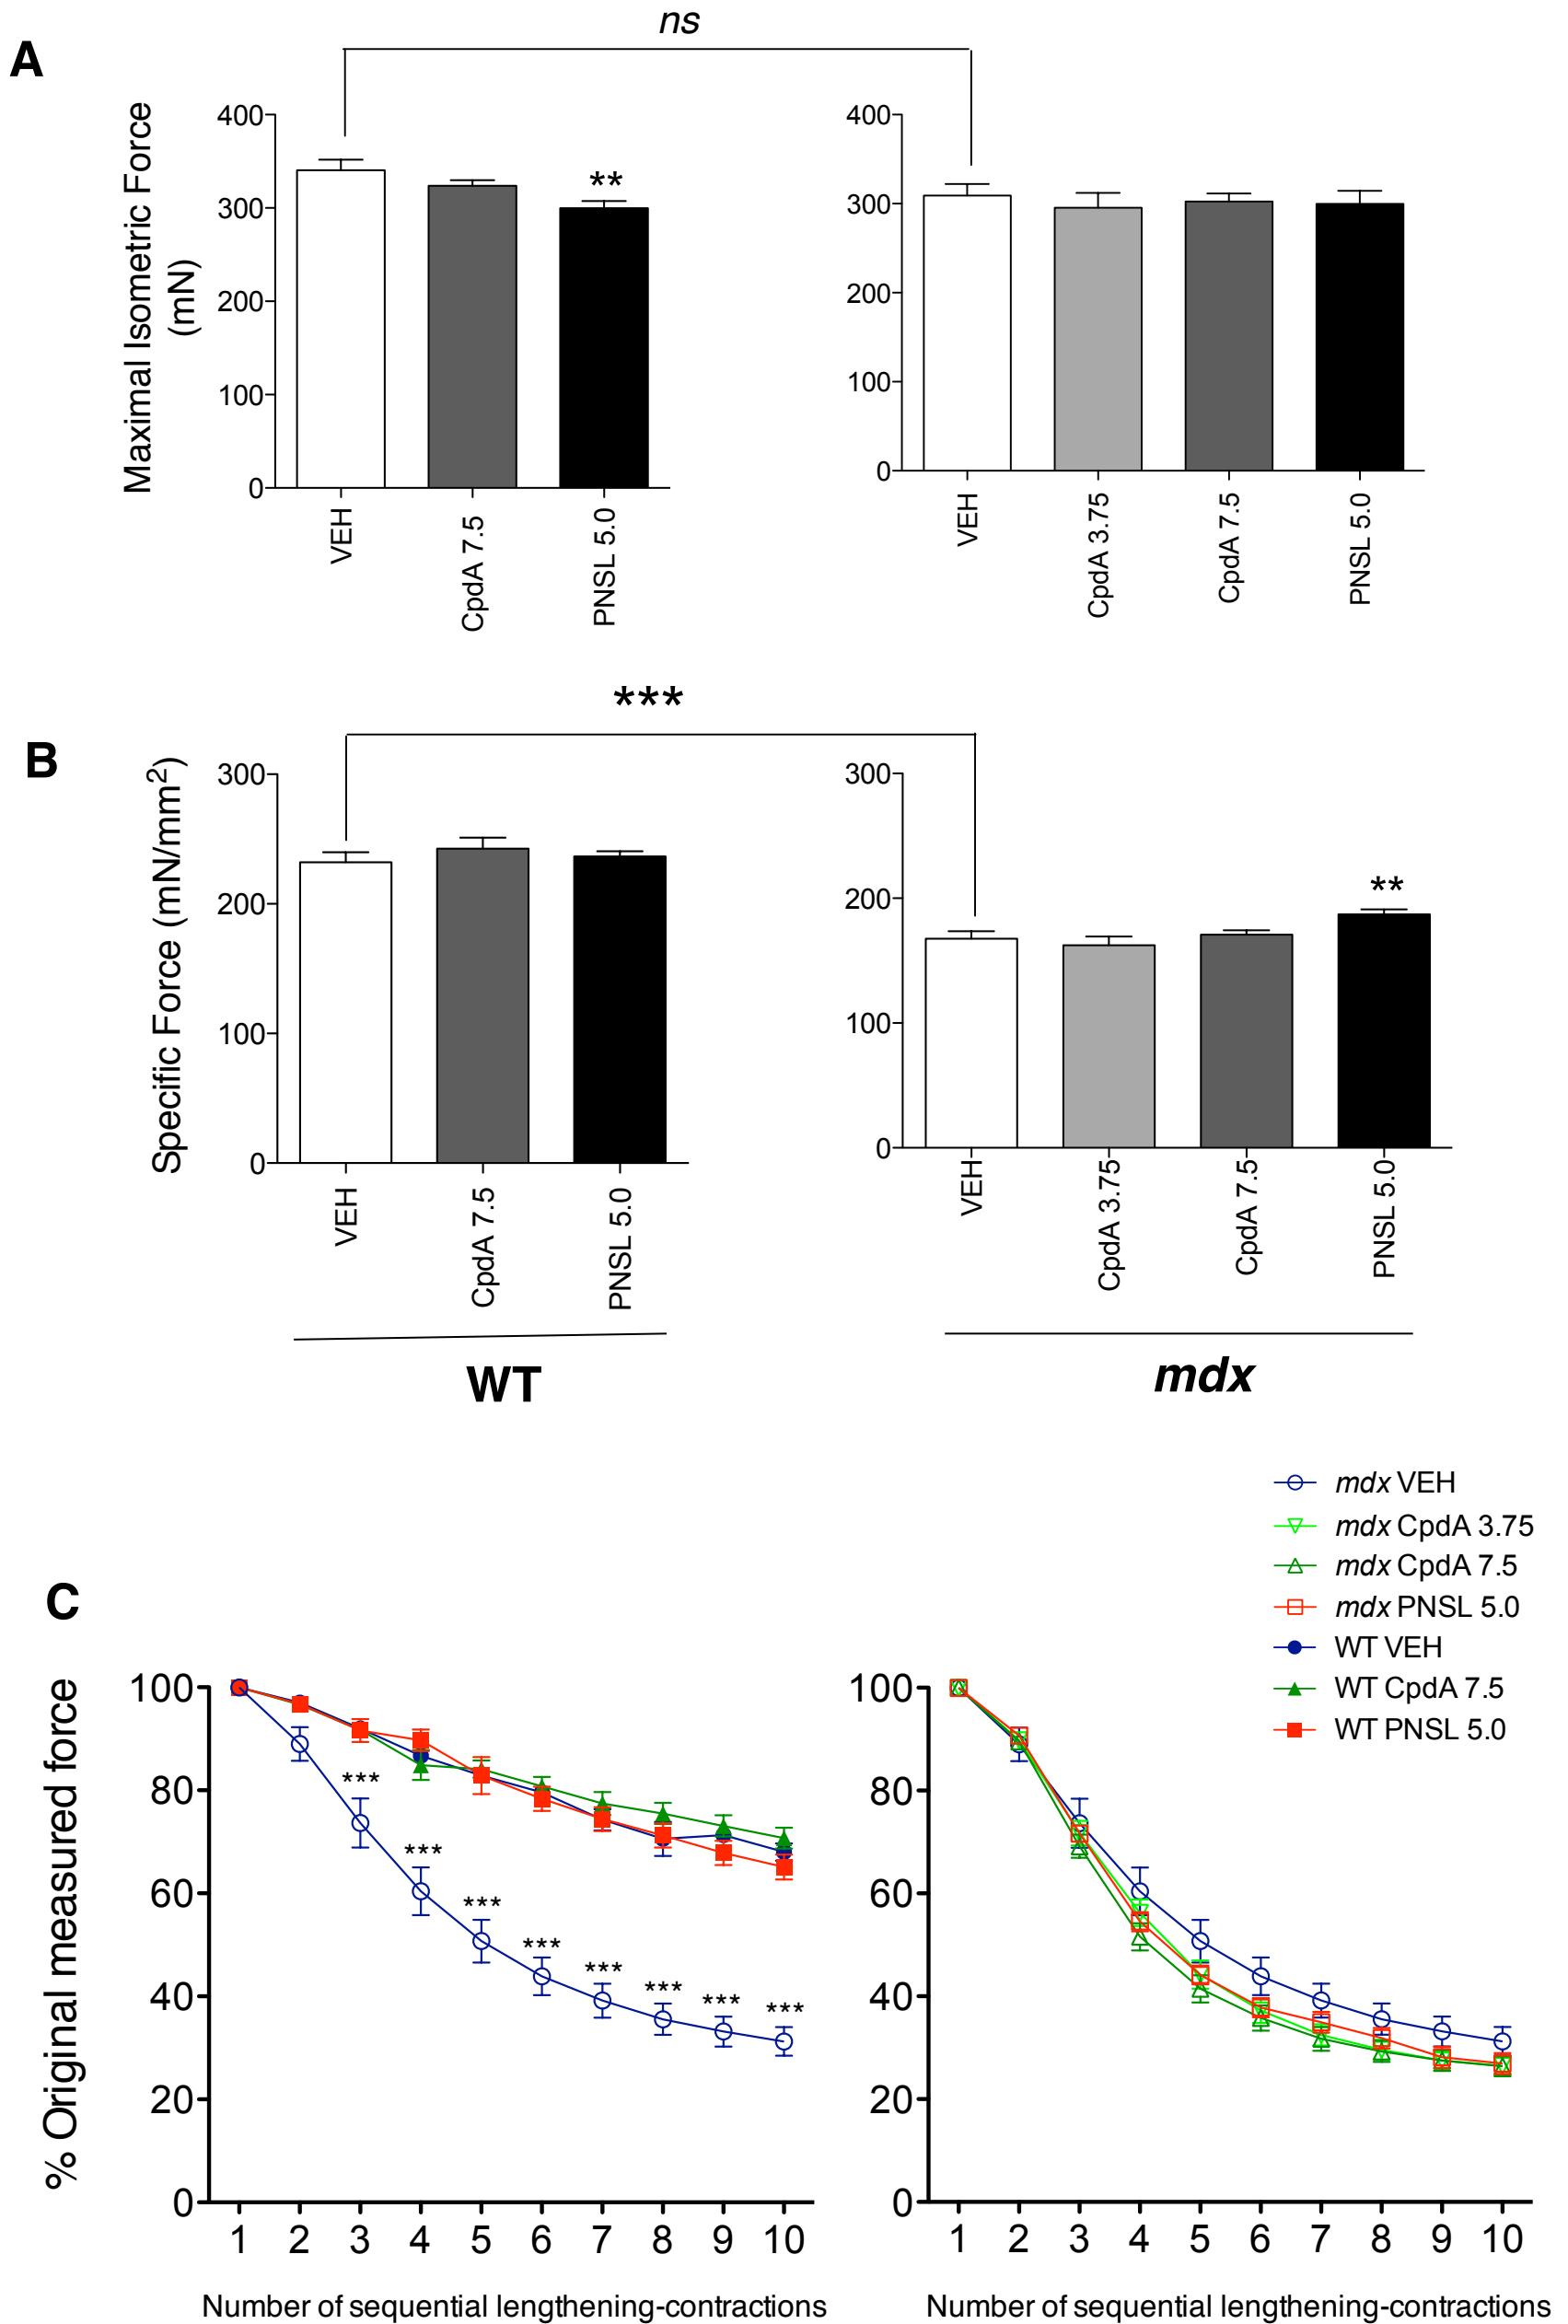

**Figure S3** *Ex vivo* measurements of (A) maximal isometric force, (B) specific force, and (C) force following sequential lengthening-contractions in EDL muscles of WT and *mdx* mice. In WT and *mdx* mice, CpdA does not significantly improve maximal isometric force or specific force, or reduce the rate of decline in generated force following sequential lengthening as measured by *ex vivo* force contraction in the Extensor Digitorum Longus (EDL). PNSL treatment was associated with significantly reduced maximal isometric force measurements in WT mice and significantly increased specific force measurement in *mdx* mice. Significant differences in maximal isometric force and rate of force decline were seen between VEH-treated WT and *mdx* mice. Protocols for *ex vivo* force measurements are described in Methods. Measurements are expressed as mean  $\pm$  SEM. All groups, n=9-12. All drug doses in mg/kg/day. \* $p < 0.05$ , \*\* $p < 0.01$ , \*\*\* $p < 0.001$ .
