# Supplementary material
Source: PubMed Central journal article supplement (PMC4104819)
Supplement: NIHMS593497-supplement-Table_s1.pdf [file NIHMS593497-supplement-Table_s1.pdf]

**Table S1.** Treatment groups for compound A efficacy trials

|                                                                         | <b>Strain</b> | <b>Group</b>                       | <b>Treatment</b>                                  |
|-------------------------------------------------------------------------|---------------|------------------------------------|---------------------------------------------------|
| Study 1<br><br>Treatment from day 18 postnatal age until 8 weeks of age | <i>mdx</i>    | VEH                                | Oral cherry syrup                                 |
|                                                                         |               |                                    | Intraperitoneal water                             |
|                                                                         | <i>mdx</i>    | PNSL5.0                            | Oral prednisolone 5.0 mg/kg/day (in cherry syrup) |
|                                                                         |               |                                    | Intraperitoneal water                             |
|                                                                         | <i>mdx</i>    | CpdA3.75                           | Oral cherry syrup                                 |
|                                                                         |               |                                    | Intraperitoneal CpdA 3.75 mg/kg/day               |
|                                                                         | <i>mdx</i>    | CpdA7.5                            | Oral cherry syrup                                 |
|                                                                         |               |                                    | Intraperitoneal CpdA 7.5 mg/kg/day                |
|                                                                         | WT            | VEH                                | Oral cherry syrup                                 |
|                                                                         |               |                                    | Intraperitoneal water                             |
|                                                                         | WT            | PNSL5.0                            | Oral prednisolone 5.0 mg/kg/day (in cherry syrup) |
|                                                                         |               |                                    | Intraperitoneal water                             |
| WT                                                                      | CpdA7.5       | Oral cherry syrup                  |                                                   |
|                                                                         |               | Intraperitoneal CpdA 7.5 mg/kg/day |                                                   |

|                                                          |            |         |                                                                            |
|----------------------------------------------------------|------------|---------|----------------------------------------------------------------------------|
| Study 2 <sup>Ⓞ</sup>                                     | <i>mdx</i> | VEH     | Oral cherry syrup<br>Intraperitoneal water                                 |
| Treatment from week 4 postnatal age until 8 weeks of age | <i>mdx</i> | PNSL5.0 | Oral Prednisolone 5.0 mg/kg/day (in cherry syrup)<br>Intraperitoneal water |
|                                                          | <i>mdx</i> | CpdA7.5 | Oral cherry syrup<br>Intraperitoneal CpdA 7.5 mg/kg/day                    |

---

Study 1, *n* = 15/group, once-daily dosing; Study 2, *n* = 10/group, once-daily dosing.

<sup>Ⓞ</sup>Study 2 was performed in the context of a validation study comparing oral CpdA at 2.5 mg/kg/day, 5.0 mg/kg/day and 7.5 mg/kg/day with intraperitoneal CpdA at 7.5 mg/kg/day. Outcome measures were limited to H&E analysis and cytokine protein levels in the gastrocnemius muscles. This study was performed in order to confirm bioactivity of intraperitoneal CpdA prior to the conduct of a more comprehensive study (Study 1).
