# Supplementary material
Source: PubMed Central journal article supplement (PMC4104819)
Supplement: NIHMS593497-supplement-Table_s3.pdf [file NIHMS593497-supplement-Table_s3.pdf]

**Table S3.** Primary and secondary antibodies used in western blot analysis

| Antibody                                                    | Dilution |
|-------------------------------------------------------------|----------|
| Primary                                                     |          |
| Rabbit polyclonal IgG to p65<br>(Five Photons Biochemicals) | 1:400    |
| Goat polyclonal IgG to Actin<br>(Santa Cruz Biotechnology)  | 1:1000   |
| Rabbit polyclonal IgG to Lamin A<br>(Abcam)                 | 1:1000   |
| Secondary                                                   |          |
| HRP-conjugated anti-rabbit<br>(GE Healthcare)               | 1:2500   |
| HRP-conjugated anti-goat<br>(Santa Cruz Biotechnology)      | 1:2500   |
